# Supplementary material
Source: publisher figshare collection journal article supplement (https://acs.figshare.com/ndownloader/files/22768316)
Supplement: Supplementary file 1 [file 22768316]

## Supporting Information

# Electrochemical SERS on 2D Mapping for Metabolites Detection

*Yow-Kuan Lin,<sup>†</sup> Ruo-ju Tai,<sup>†</sup> Shu-Chen Wei,<sup>\*,‡</sup> and Shyh-Chyang Luo<sup>\*,†</sup>*

<sup>†</sup>Department of Materials Science and Engineering, National Taiwan University, No. 1, Sec. 4, Roosevelt Road, Taipei 10617, Taiwan

<sup>‡</sup>Department of Internal Medicine, National Taiwan University Hospital and College of Medicine, No.1 Jen Ai Road, Section 1, Taipei 10051, Taiwan

\*Email: shuchenwei@ntu.edu.tw

\*Email: shyhchyang@ntu.edu.tw

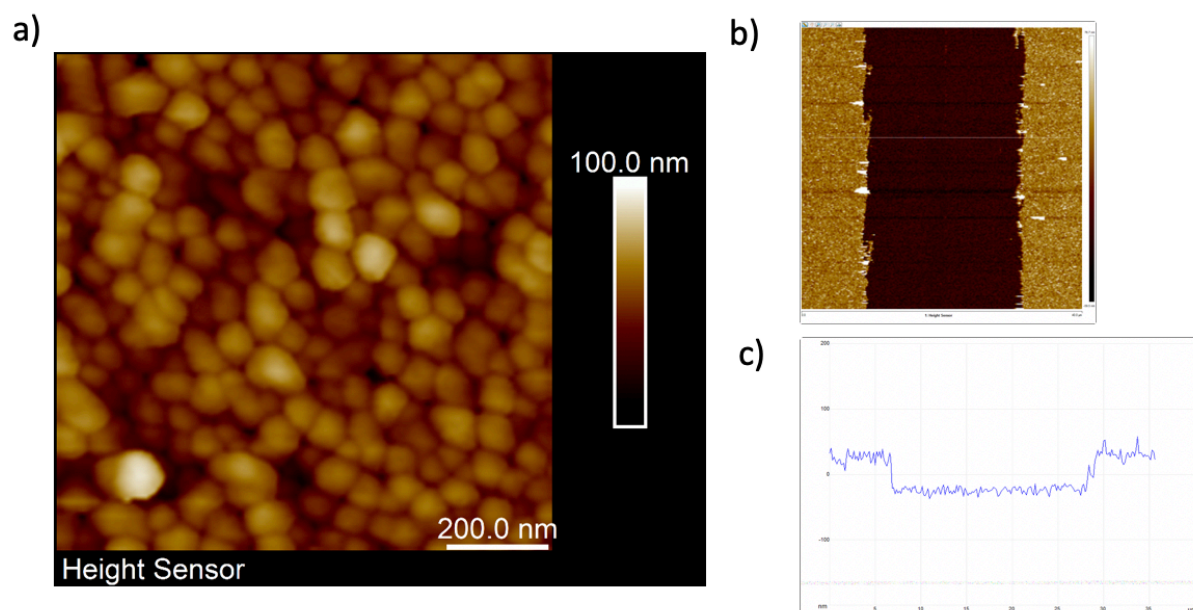

**Figure S1.** a) The morphology of AuNP-coated substrates; b) The cross-section image of AuNP-coated substrates; c) 2D plot of the cross-section, which shows the thickness of AuNPs at about 50 nm.

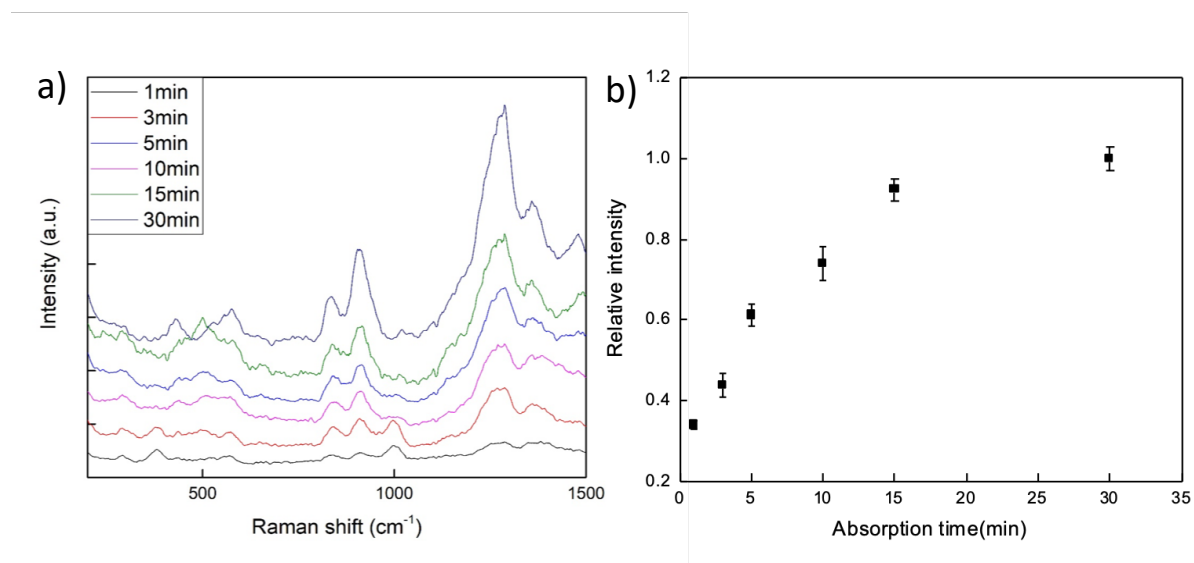

**Figure S2.** (a) SERS spectrum of 6-TGNs with incremental absorption time (b) Relative intensity of different absorption time at  $1290\text{ cm}^{-1}$ , which indicates that the absorption saturates after 30 mins.

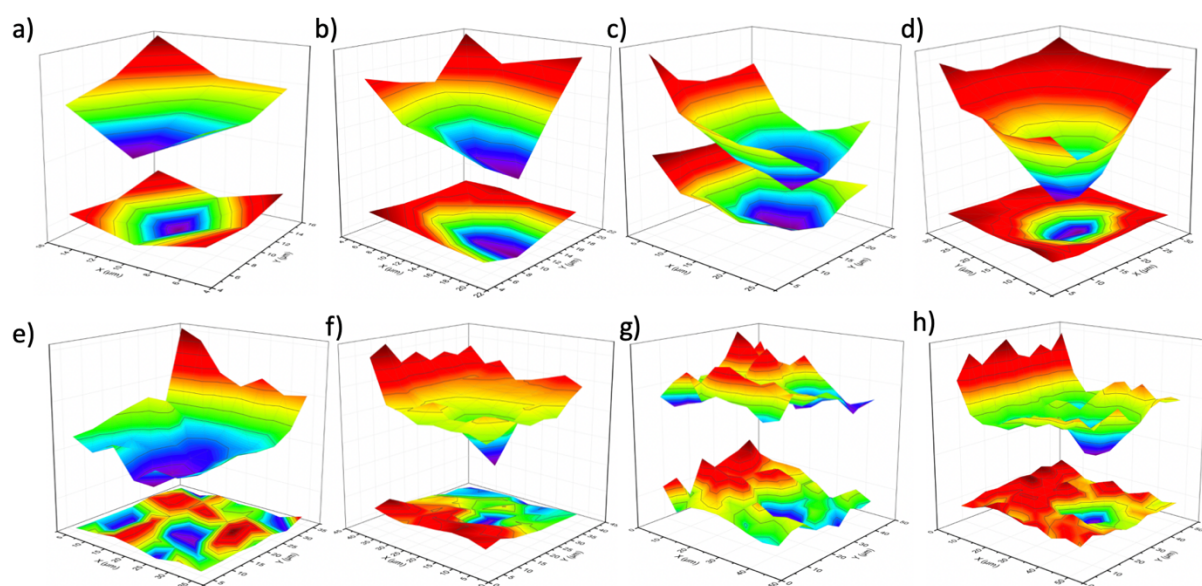

**Figure S3.** Surface mapping of 5  $\mu\text{M}$  6-TGNs with varying scan range at a)  $15 \times 15$ , b)  $20 \times 20$ , c)  $25 \times 25$ , d)  $30 \times 30$ , e)  $35 \times 35$ , f)  $40 \times 40$ , g)  $45 \times 45$ , h)  $50 \times 50 \mu\text{m}^2$  before and after applying voltage at  $-0.6 \text{ V}$ . The lower one is the pre-enhanced intensity distribution while the upper one is the intensity distribution after applying voltage.

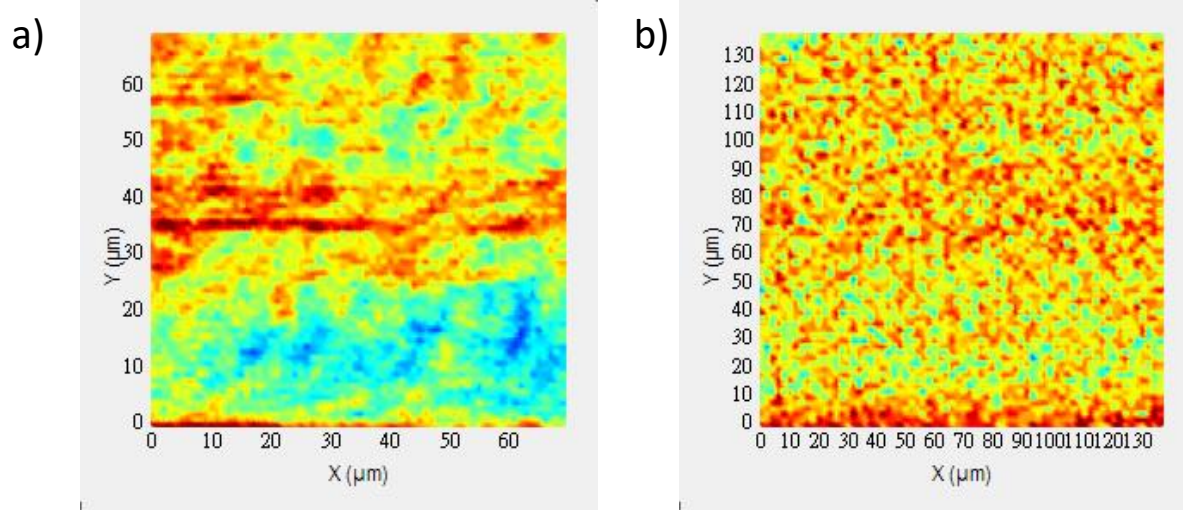

**Figure S4.** Surface mapping of a) AuNPs substrate at a scan resolution of 1  $\mu\text{m}$ , and b) silicon wafer at a scan resolution at 2  $\mu\text{m}$ .

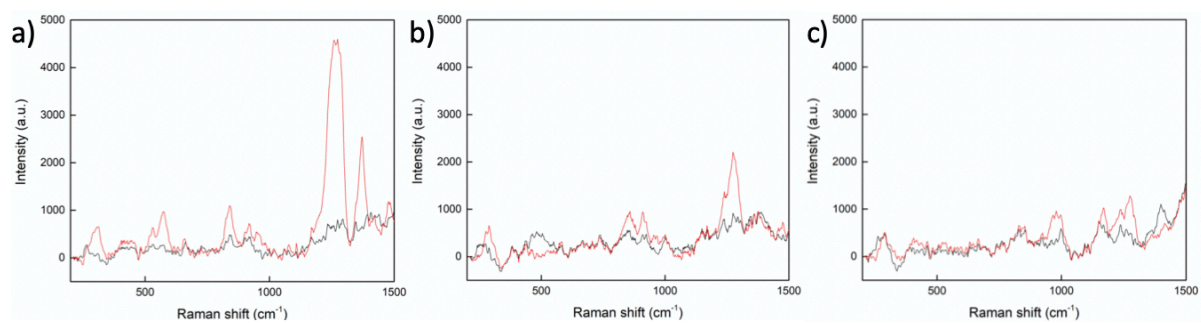

**Figure S5.** Electrochemical SERS result of 6-TGNs at a) 500, b) 50, and c) 10 nM. The black line indicates Raman spectrum before apply voltage, while red line indicates Raman spectrum after applying voltage at -0.8 V vs. Ag/AgCl.
